# Supplementary material
Source: PubMed Central journal article supplement (PMC5912996)

## Supplemental Figure 2

### Samples above the DSI cutoff

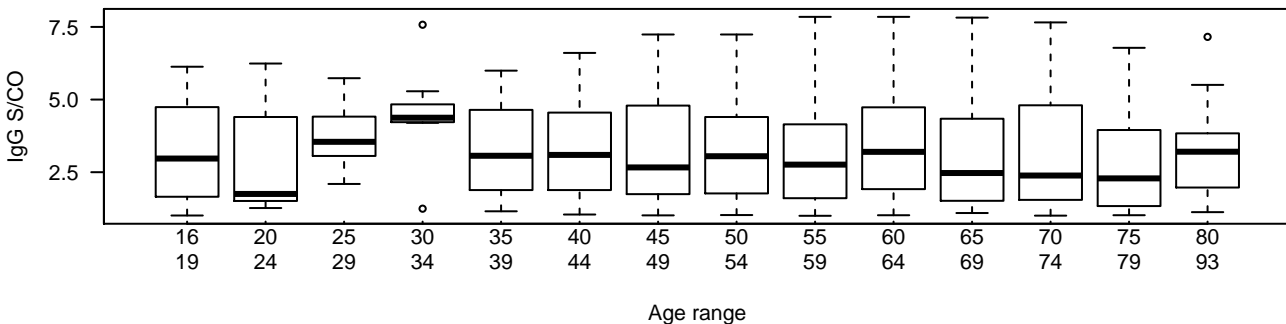

### Samples above the MP Biomedicals cutoff

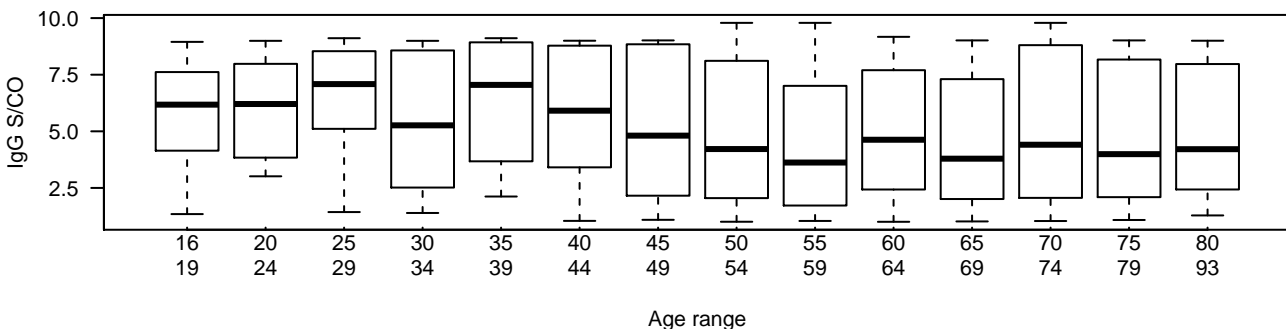

### Samples above the Wantai cutoff

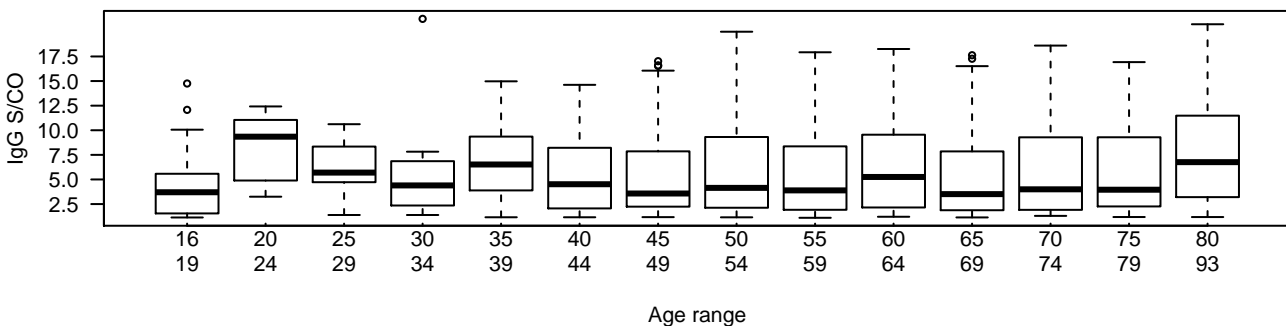

Supplement: NIHMS951793-supplement-Supplemental_Figure_2.pdf [file NIHMS951793-supplement-Supplemental_Figure_2.pdf]
