# Supplementary material
Source: PubMed Central journal article supplement (PMC5912996)

Supplemental Figure 1

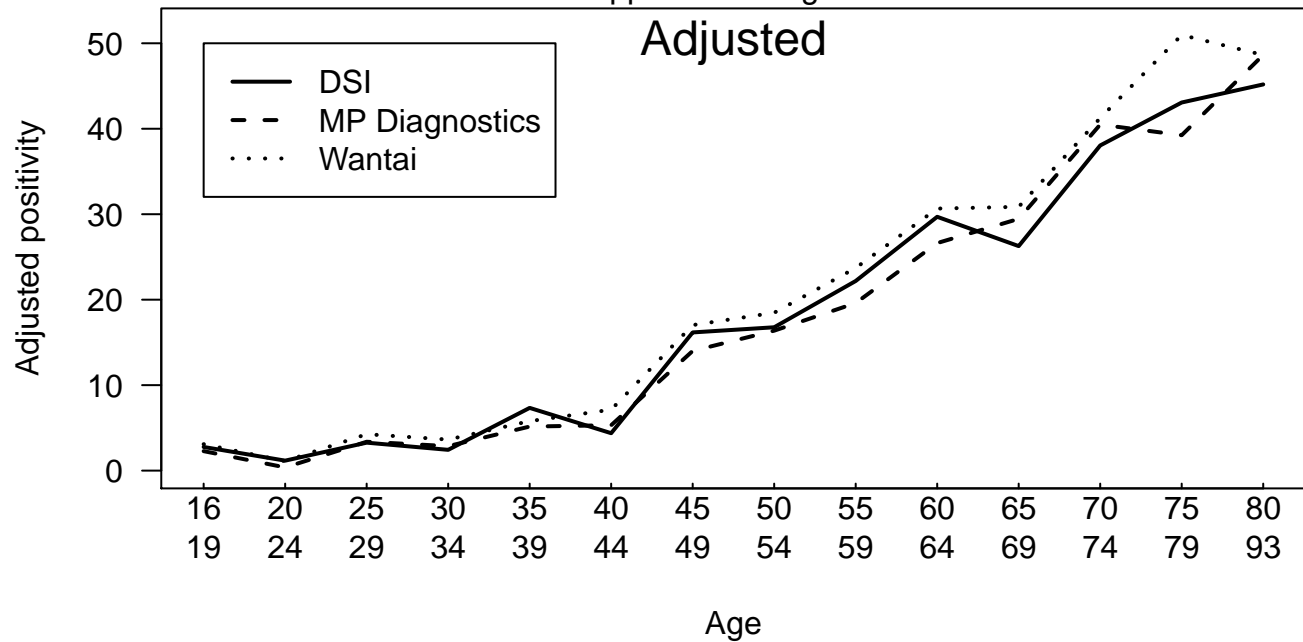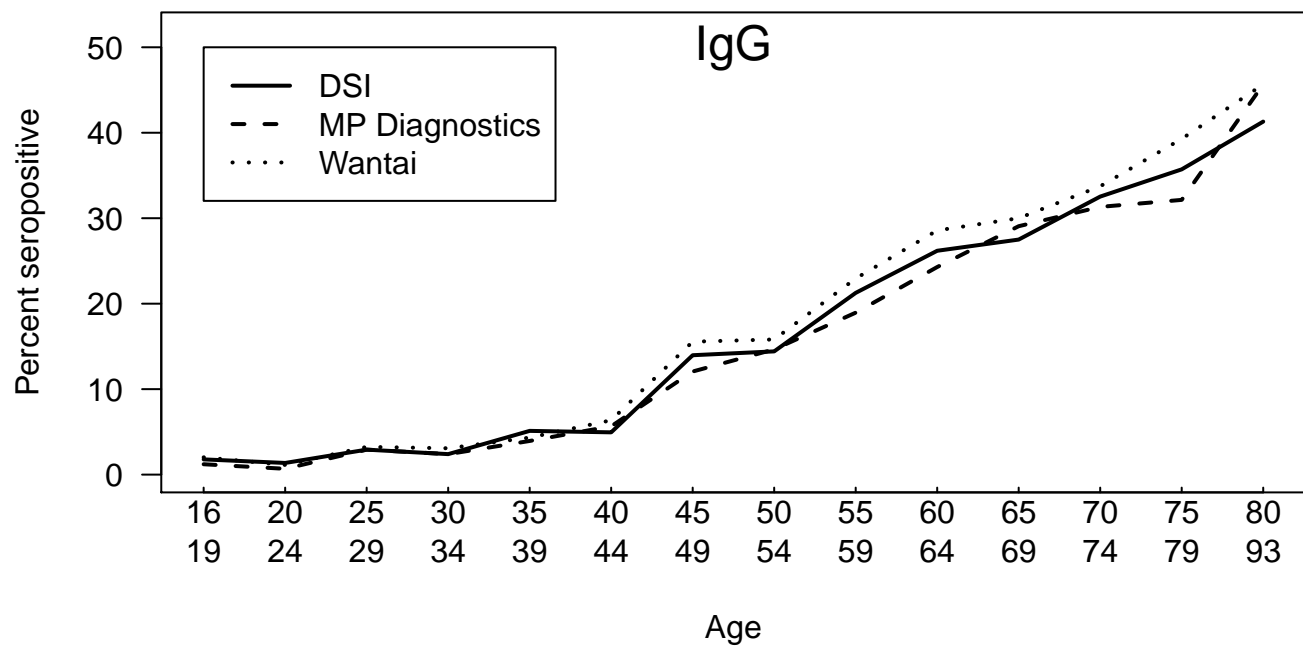

Supplement: NIHMS951793-supplement-Supplemental_Figure_1.pdf [file NIHMS951793-supplement-Supplemental_Figure_1.pdf]

Supplemental Figure 3

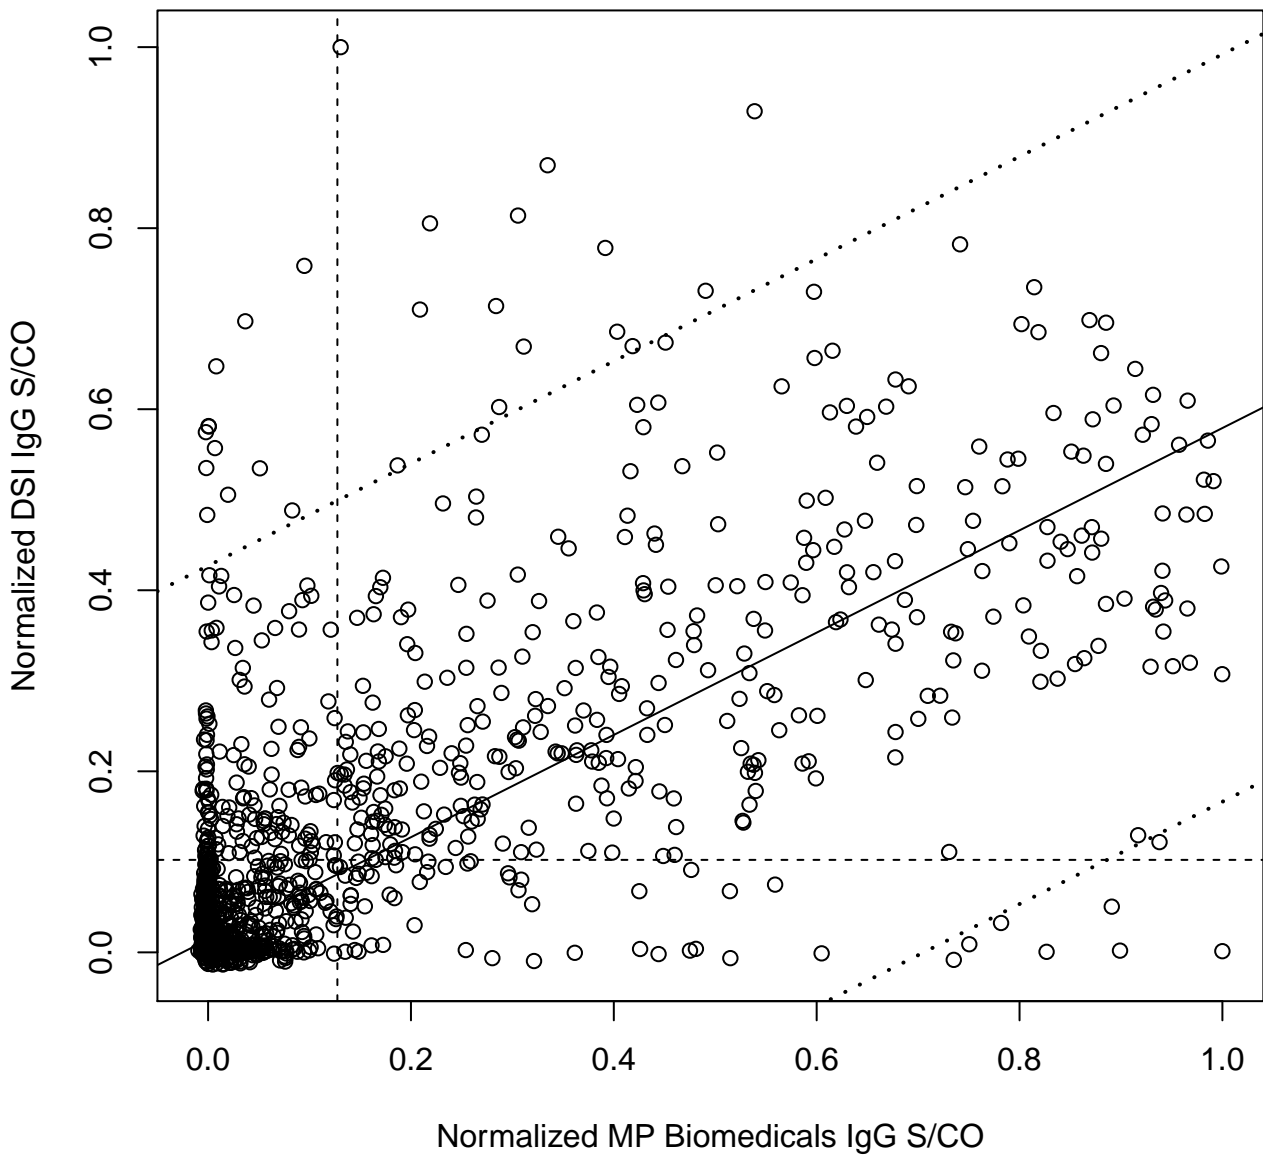

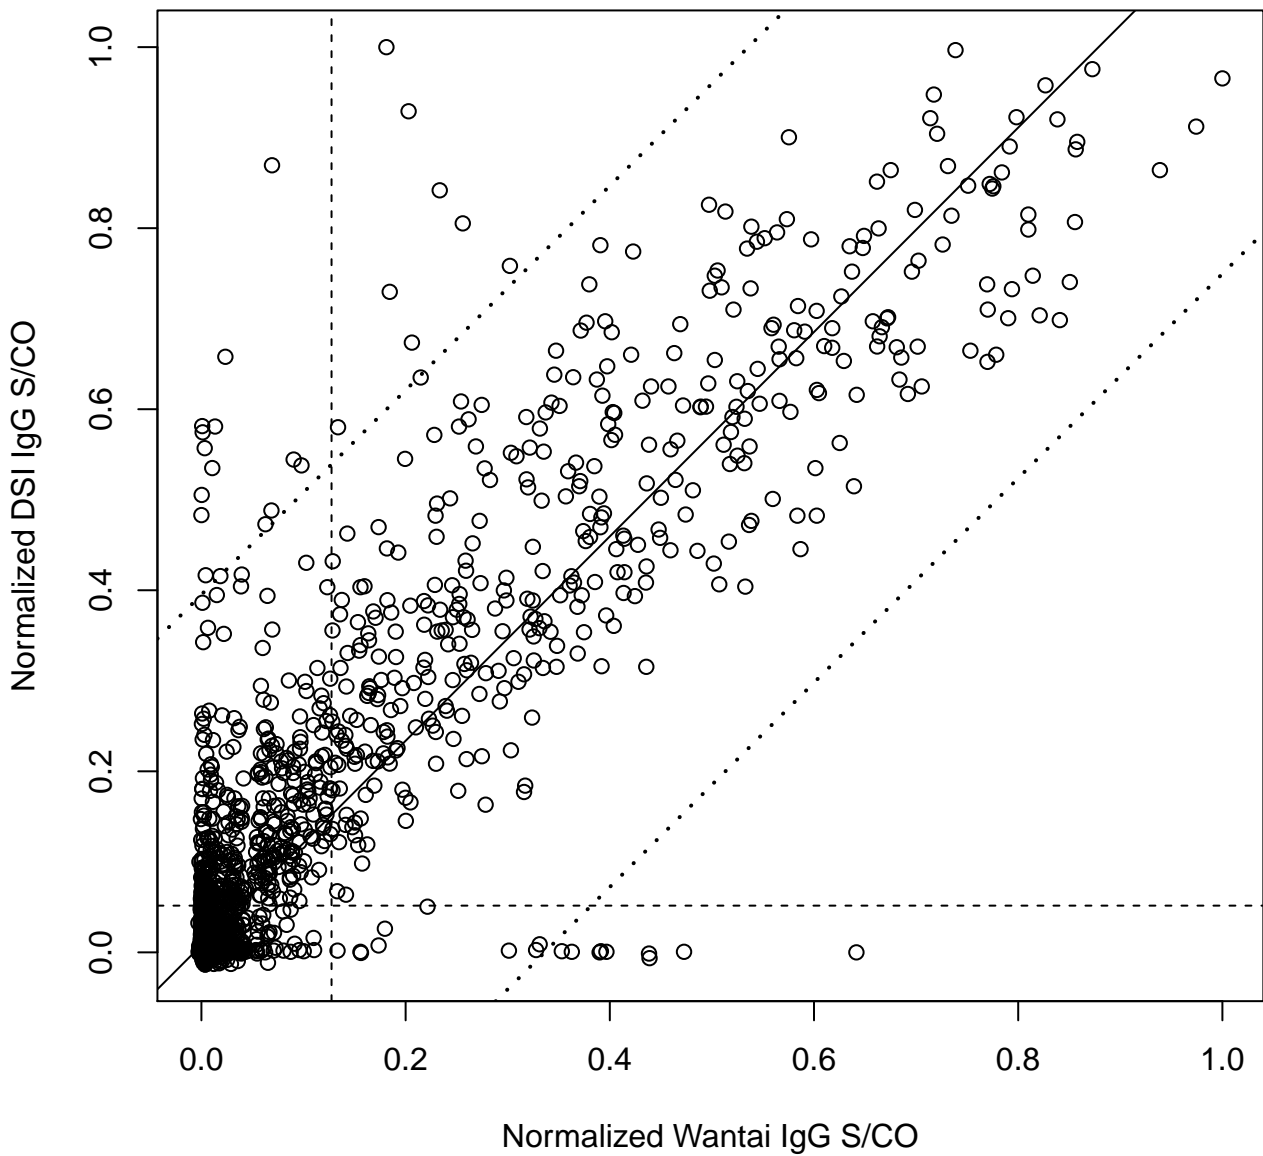

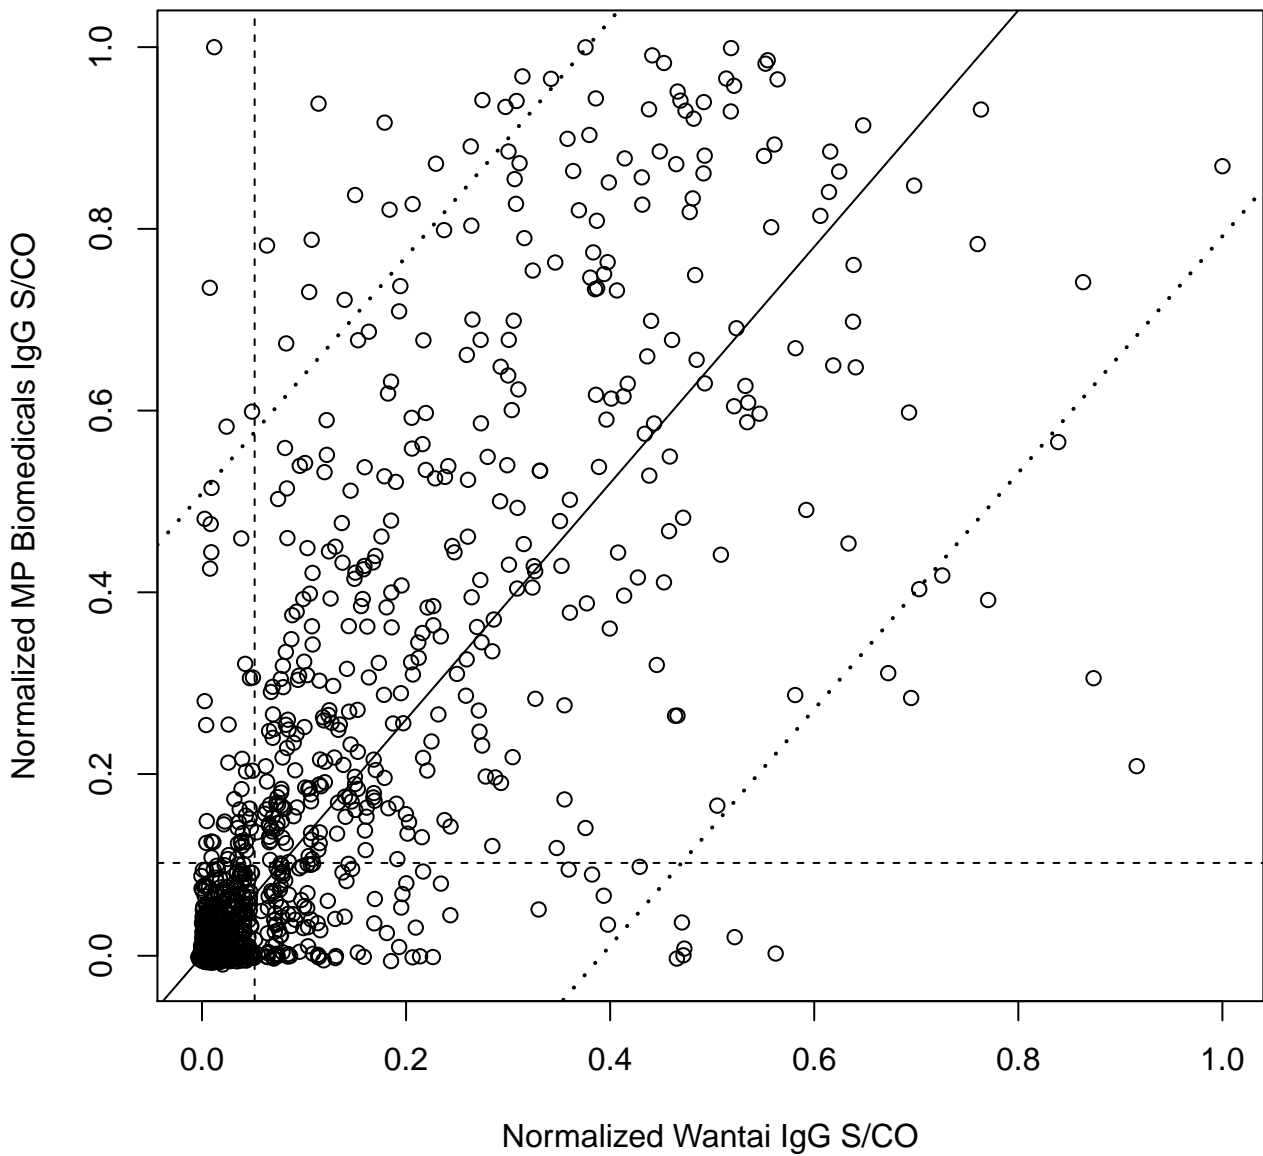

Supplement: NIHMS951793-supplement-Supplemental_Figure_3.pdf [file NIHMS951793-supplement-Supplemental_Figure_3.pdf]
